# Supplementary material
Source: PubMed Central journal article supplement (PMC6532647)
Supplement: NIHMS1024569-supplement-Supp_Material.pdf [file NIHMS1024569-supplement-Supp_Material.pdf]

## Supplementary Figure Legends

### Fig. S1

#### Cells from Fig. 1 proceed synchronously through meiosis

(a) Cell-cycle stage quantification for Fig. 1a.

(b) Only the full-length Sld2 protein isoform is detectable during meiosis (yDP336). Top: Sld2-13myc immunoblot during meiosis with protein samples run on a 12% SDS-PAGE gel. Size markers are indicated to the right of the gel. These are the same protein samples as those in Fig. 1b. Bottom: Cell-cycle stage quantification for samples used in this figure and Fig. 1b.

(c) Cell-cycle stage quantification for Fig. 1c.

### Fig. S2

#### Characterization of the *CDC6<sup>short</sup>* and *SLD2<sup>short</sup>* RNA's and *Cdc6<sup>short</sup>* protein

(a) 5' RACE of *SLD2* shows heterogeneous 5' ends during the meiotic divisions. Left: Agarose gel of PCR products. Portions that were gel purified for ligation into a cloning vector are denoted by colored boxes, along with the range of 5' ends detected for each species. Right: Diagram of *SLD2* promoter, ORF, and 13myc tag with the relative location of *SLD2*-specific primers for the RT reaction and PCR reactions. Colored vertical lines and numbers indicate the 5' ends of individually sequenced clones from specific gel-purified sections.

(b) Neither full-length *Cdc6* nor *Cdc6<sup>short</sup>* depend on Met120, Met261, or Met267. Plasmids containing  $P_{CDC6}$ -*CDC6*-3V5 with Met→Val start codon mutations were integrated into yeast, and the subsequent strains were assayed for the ability to produce *Cdc6<sup>short</sup>* during meiosis. *CDC6<sup>Met-120-Val</sup>* (yDP226, lanes 1-7); *CDC6<sup>Met-261-Val</sup>* (yDP228, lanes 8-14); *CDC6<sup>Met-267-Val</sup>* (yDP229, lanes 15-21); *CDC6<sup>Met-261/267-Val</sup>* (yDP230, lanes 22-28). The time after transfer into sporulation medium is indicated above each lane. Protein was detected by V5-immunoblot.

### Fig. S3

#### *Cdc6<sup>short</sup>* does not form a stable complex with ORC, Cdt1, and Mcm2-7 in ATPγS

(a) WT *Cdc6* can form the OCCM complex (lanes 2-6), whereas *Cdc6<sup>short</sup>* cannot form the OCCM complex (lanes 4-7) at all concentrations tested in ATPγS. Top: Total protein stain (Krypton stain). Bottom: FLAG-immunoblot to specifically examine *Cdc6* vs *Cdc6<sup>short</sup>*, as well as Mcm3 and Orc1, all of which have a FLAG epitope tag.

### Fig. S4

**Cells from Fig. 4 complete both meiotic divisions**

(a) Cells from Fig. 4c complete both MI and MII.

(a) Cells from Fig. 4d complete both MI and MII.

**Fig. S5**

**Cells from Fig. 5 complete both meiotic divisions**

(a) Cells from Fig. 5b and 5c complete both MI and MII.

# Supplementary Fig. S1

**a**

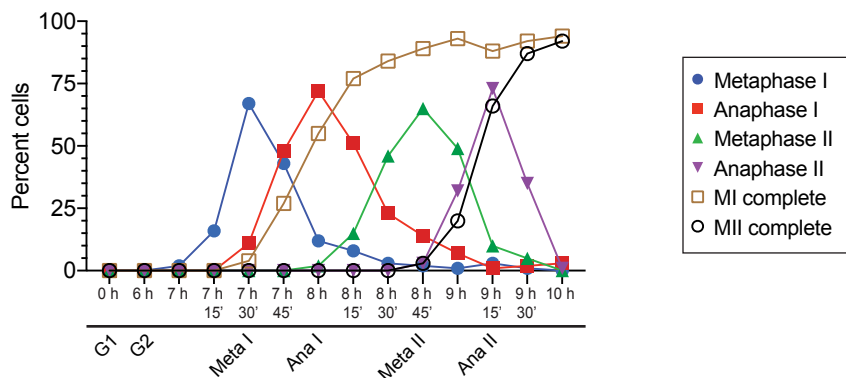

**b**

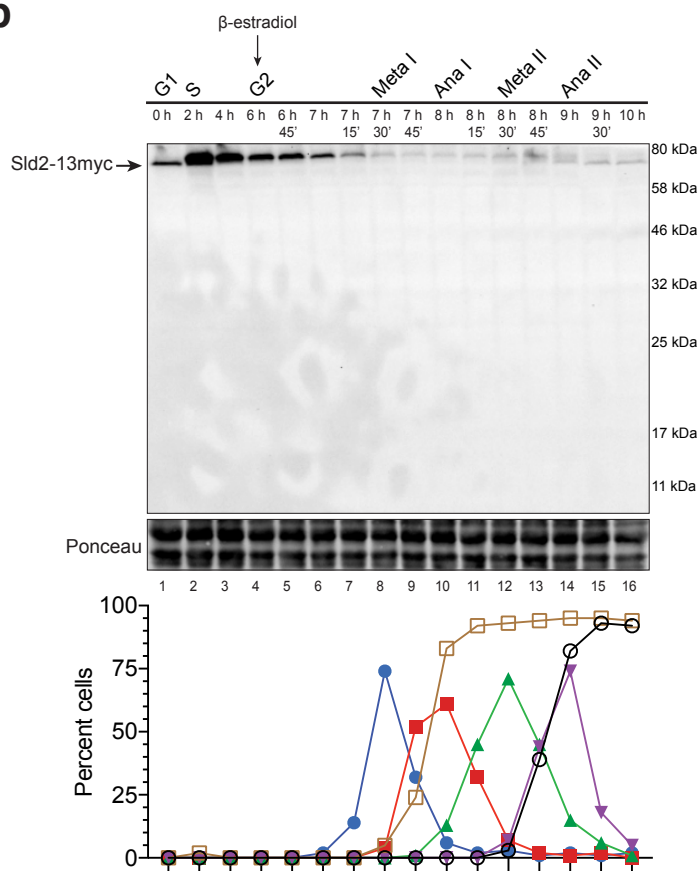

**c**

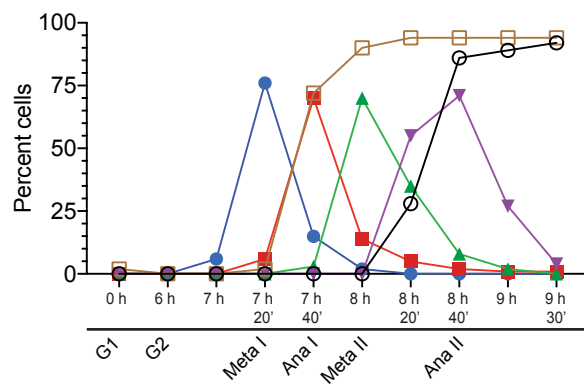

# Supplementary Fig. S2

**a**

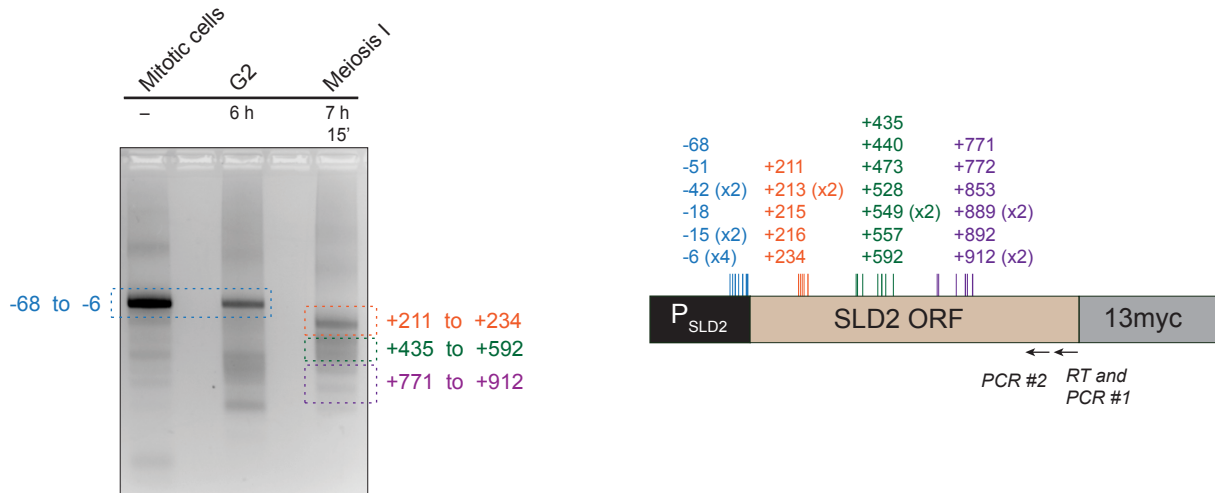

**b**

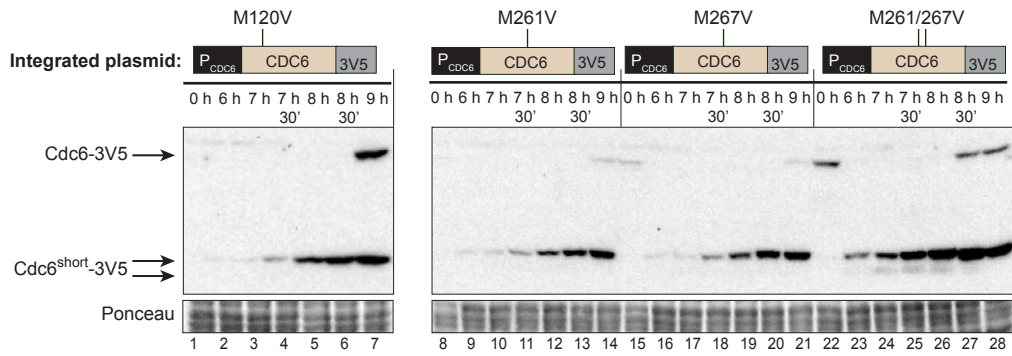

# Supplementary Fig. S3

a

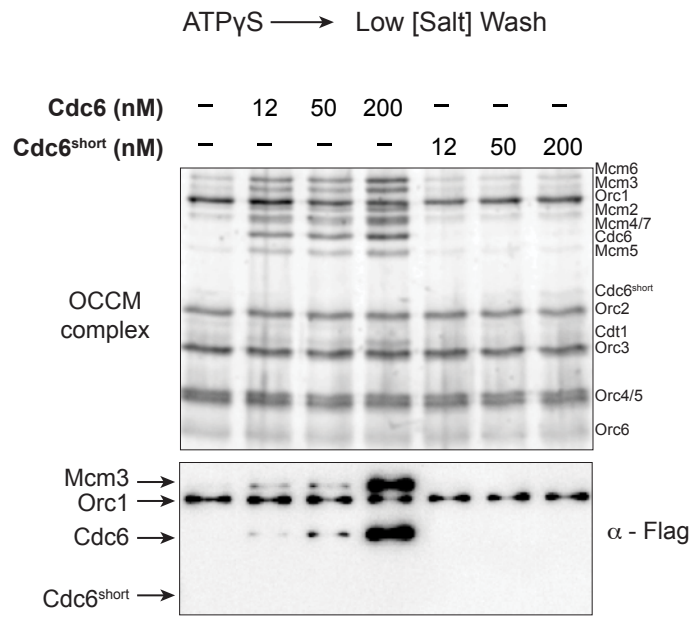

# Supplementary Fig. S4

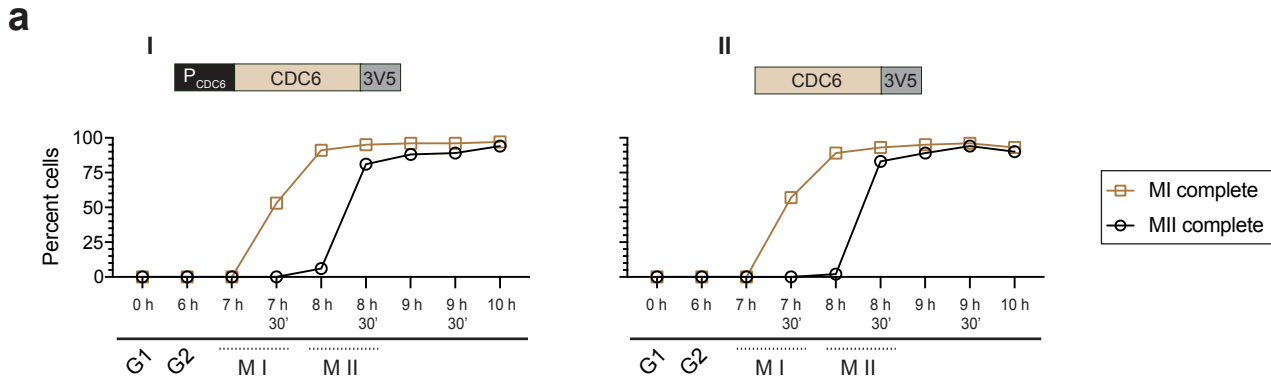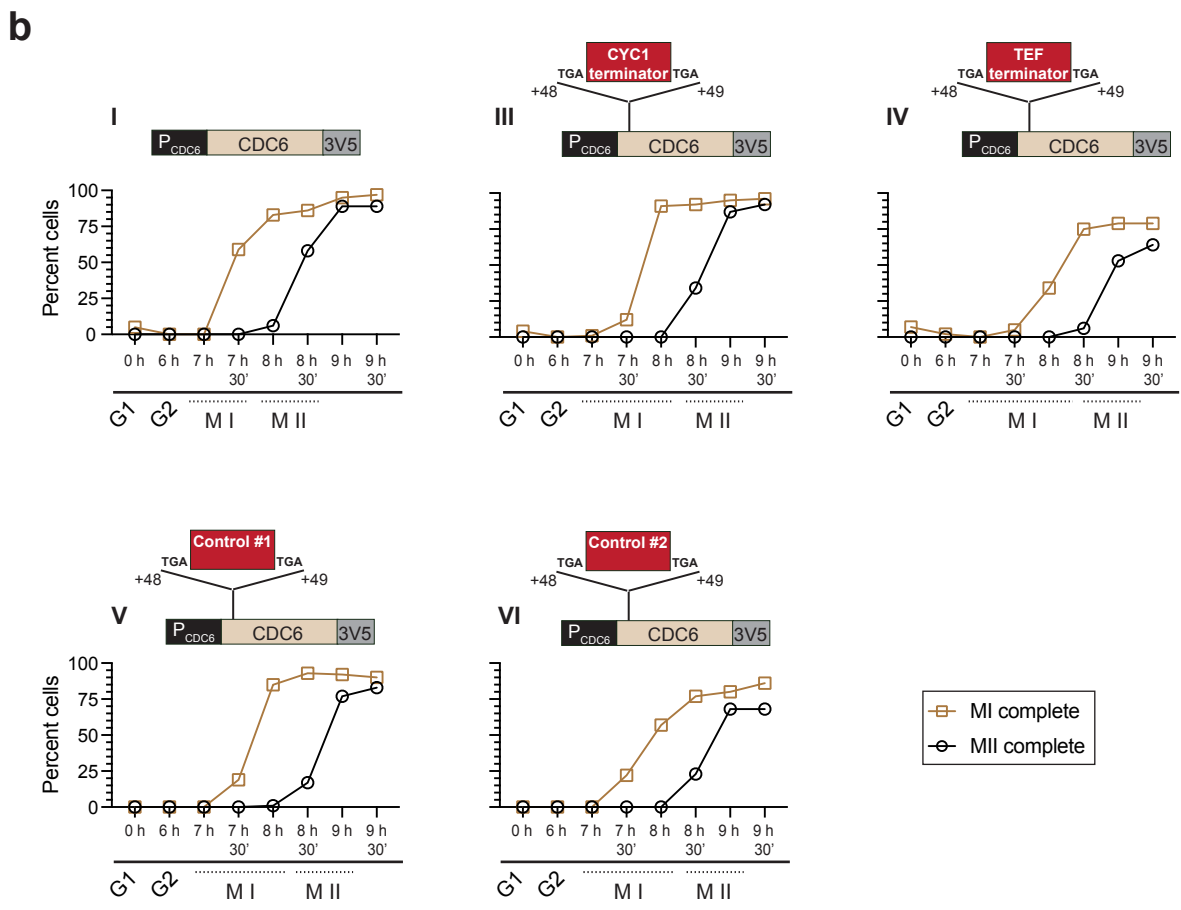

# Supplementary Fig. S5

a

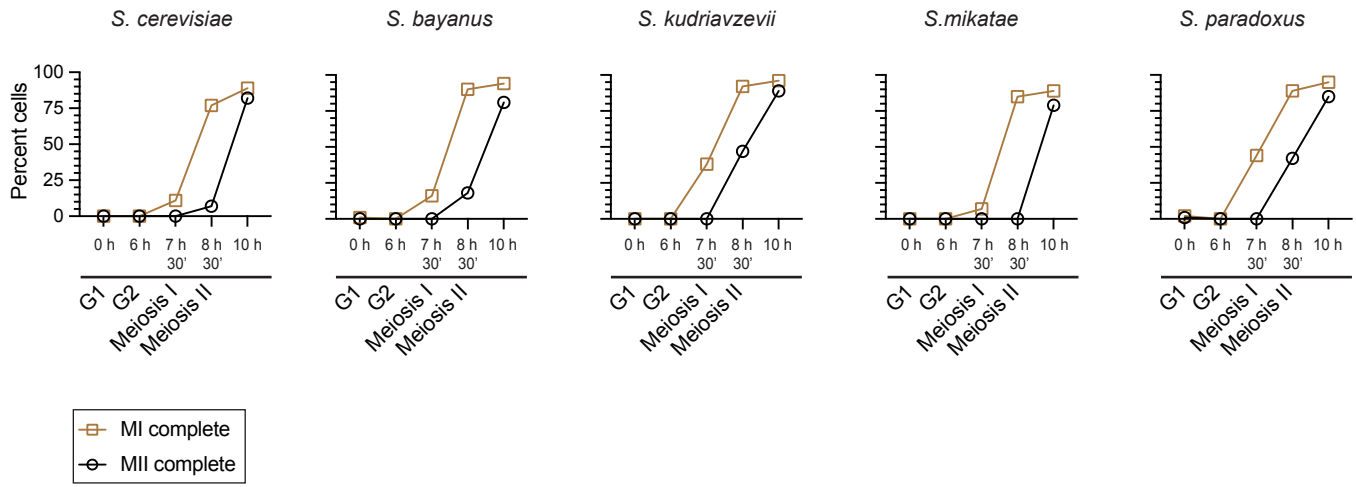

Table S1: Strains used in this study

| Strain | Genotype                                                                                                                                                                       | Source                      |
|--------|--------------------------------------------------------------------------------------------------------------------------------------------------------------------------------|-----------------------------|
| yDP33  | SK1 MATalpha CDC6-3V5::KANMX6                                                                                                                                                  | This study                  |
| yDP71  | SK1 MATa/alpha ura3::pGPD1-GAL4(848).ER::URA3/ura3::pGPD1-GAL4(848).ER::URA3 GAL-NDT80::TRP1/GAL-NDT80::TRP1<br>CDC6-3V5::KANMX6/CDC6-3V5::KANMX6                              | Phizicky <i>et al.</i> 2018 |
| yDP198 | SK1 MATa/alpha ura3::pGPD1-GAL4(848).ER::URA3/ura3::pGPD1-GAL4(848).ER::URA3 GAL-NDT80::TRP1/GAL-NDT80::TRP1<br>leu2/leu2::pDP31(PCDC6-CDC6-3V5)::LEU2                         | This study                  |
| yDP213 | SK1 MATa/alpha ura3::pGPD1-GAL4(848).ER::URA3/ura3::pGPD1-GAL4(848).ER::URA3 GAL-NDT80::TRP1/GAL-NDT80::TRP1<br>leu2/leu2::pDP34(PCDC6-CDC6(Met-1-Val)-3V5)::LEU2              | This study                  |
| yDP226 | SK1 MATa/alpha ura3::pGPD1-GAL4(848).ER::URA3/ura3::pGPD1-GAL4(848).ER::URA3 GAL-NDT80::TRP1/GAL-NDT80::TRP1<br>leu2/leu2::pDP38(PCDC6-CDC6(Met-120-Val)-3V5)::LEU2            | This study                  |
| yDP227 | SK1 MATa/alpha ura3::pGPD1-GAL4(848).ER::URA3/ura3::pGPD1-GAL4(848).ER::URA3 GAL-NDT80::TRP1/GAL-NDT80::TRP1<br>leu2/leu2::pDP39(PCDC6-CDC6(Met-202/225-Val)-3V5)::LEU2        | This study                  |
| yDP228 | SK1 MATa/alpha ura3::pGPD1-GAL4(848).ER::URA3/ura3::pGPD1-GAL4(848).ER::URA3 GAL-NDT80::TRP1/GAL-NDT80::TRP1<br>leu2/leu2::pDP40(PCDC6-CDC6(Met-261-Val)-3V5)::LEU2            | This study                  |
| yDP229 | SK1 MATa/alpha ura3::pGPD1-GAL4(848).ER::URA3/ura3::pGPD1-GAL4(848).ER::URA3 GAL-NDT80::TRP1/GAL-NDT80::TRP1<br>leu2/leu2::pDP41(PCDC6-CDC6(Met-267-Val)-3V5)::LEU2            | This study                  |
| yDP230 | SK1 MATa/alpha ura3::pGPD1-GAL4(848).ER::URA3/ura3::pGPD1-GAL4(848).ER::URA3 GAL-NDT80::TRP1/GAL-NDT80::TRP1<br>leu2/leu2::pDP42(PCDC6-CDC6(Met-261/267-Val)-3V5)::LEU2        | This study                  |
| yDP231 | SK1 MATa/alpha ura3::pGPD1-GAL4(848).ER::URA3/ura3::pGPD1-GAL4(848).ER::URA3 GAL-NDT80::TRP1/GAL-NDT80::TRP1<br>leu2/leu2::pDP44(PCDC6-CDC6(Met-202-Val)-3V5)::LEU2            | This study                  |
| yDP232 | SK1 MATa/alpha ura3::pGPD1-GAL4(848).ER::URA3/ura3::pGPD1-GAL4(848).ER::URA3 GAL-NDT80::TRP1/GAL-NDT80::TRP1<br>leu2/leu2::pDP45(PCDC6-CDC6(Met-225-Val)-3V5)::LEU2            | This study                  |
| yDP242 | SK1 MATa/alpha ura3::pGPD1-GAL4(848).ER::URA3/ura3::pGPD1-GAL4(848).ER::URA3 GAL-NDT80::TRP1/GAL-NDT80::TRP1<br>leu2/leu2::pDP55(Promoter deletion, CDC6-3V5)::LEU2            | This study                  |
| yDP245 | SK1 MATa CDC6(Met-202/225-Val)-3V5::KANMX6                                                                                                                                     | This study                  |
| yDP246 | SK1 MATalpha CDC6(Met-202/225-Val)-3V5::KANMX6                                                                                                                                 | This study                  |
| yDP249 | SK1 MATa/alpha ura3::pGPD1-GAL4(848).ER::URA3/ura3::pGPD1-GAL4(848).ER::URA3 GAL-NDT80::TRP1/GAL-NDT80::TRP1<br>leu2/leu2::pDP63(PCDC6-CDC6(+48-CYC1 Terminator+49)-3V5)::LEU2 | This study                  |



Table S1: Strains used in this study

|          |                                                                                                                                                                                  |                             |
|----------|----------------------------------------------------------------------------------------------------------------------------------------------------------------------------------|-----------------------------|
| yDP250   | SK1 MATa/alpha ura3::pGPD1-GAL4(848).ER::URA3/ura3::pGPD1-GAL4(848).ER::URA3 GAL-NDT80::TRP1/GAL-NDT80::TRP1 leu2/leu2::pDP64(PCDC6-CDC6(+48-TEF Terminator+49)-3V5)::LEU2       | This study                  |
| yDP251   | SK1 MATa/alpha ura3::pGPD1-GAL4(848).ER::URA3/ura3::pGPD1-GAL4(848).ER::URA3 GAL-NDT80::TRP1/GAL-NDT80::TRP1 leu2/leu2::pDP65(PCDC6-CDC6(+48-Internal GFP ORF+49)-3V5)::LEU2     | This study                  |
| yDP252   | SK1 MATa/alpha ura3::pGPD1-GAL4(848).ER::URA3/ura3::pGPD1-GAL4(848).ER::URA3 GAL-NDT80::TRP1/GAL-NDT80::TRP1 leu2/leu2::pDP66(PCDC6-CDC6(+48-Internal GST ORF+49)-3V5)::LEU2     | This study                  |
| yDP259   | SK1 MATa/alpha ura3::pGPD1-GAL4(848).ER::URA3/ura3::pGPD1-GAL4(848).ER::URA3 GAL-NDT80::TRP1/GAL-NDT80::TRP1 CDC6(Met-202/225-Val)-3V5::KANMX6/CDC6(Met-202/225-Val)-3V5::KANMX6 | This study                  |
| yDP336   | SK1 MATa/alpha ura3::pGPD1-GAL4(848).ER::URA3/ura3::pGPD1-GAL4(848).ER::URA3 GAL-NDT80::TRP1/GAL-NDT80::TRP1 SLD2-13myc::KANMX6/SLD2-13myc::KANMX6                               | Phizicky <i>et al.</i> 2018 |
| yDP668   | SK1 MATa/alpha ura3::pGPD1-GAL4(848).ER::URA3/ura3::pGPD1-GAL4(848).ER::URA3 GAL-NDT80::TRP1/GAL-NDT80::TRP1 leu2/leu2::pDP152( <i>S. bayanus</i> PCDC6-CDC6-3V5)::LEU2          | This study                  |
| yDP670   | SK1 MATa/alpha ura3::pGPD1-GAL4(848).ER::URA3/ura3::pGPD1-GAL4(848).ER::URA3 GAL-NDT80::TRP1/GAL-NDT80::TRP1 leu2/leu2::pDP153( <i>S. kudriavzevii</i> PCDC6-CDC6-3V5)::LEU2     | This study                  |
| yDP671   | SK1 MATa/alpha ura3::pGPD1-GAL4(848).ER::URA3/ura3::pGPD1-GAL4(848).ER::URA3 GAL-NDT80::TRP1/GAL-NDT80::TRP1 leu2/leu2::pDP155( <i>S. mikatae</i> PCDC6-CDC6-3V5)::LEU2          | This study                  |
| yDP673   | SK1 MATa/alpha ura3::pGPD1-GAL4(848).ER::URA3/ura3::pGPD1-GAL4(848).ER::URA3 GAL-NDT80::TRP1/GAL-NDT80::TRP1 leu2/leu2::pDP156( <i>S. paradoxus</i> PCDC6-CDC6-3V5)::LEU2        | This study                  |
| yST144   | W303 MATa bar1::hisG pep4::unmarked TRP1::pSKM003(pGAL1,10-MCM6,MCM7) HIS3::pSKM004-(pGAL1,10-MCM2,Flag-MCM3) LYS2::pSKM002-(pGAL1,10-MCM4,MCM5) URA3::pALS1(pGAL1,10-Cdt1,GAL4) | Ticau <i>et al.</i> , 2014  |
| ySDORC   | W303 MATa bar1::hyg pep4::kanMX TRP1::pGAL1,10-ORC5,ORC6 HIS3::pGAL1,10-ORC3,ORC4 URA3::pGAL1,10-CBP-TEV-ORC1,ORC2                                                               | John Diffley                |
| YZBS-113 | <i>S. bayanus</i> ho::HYGb lys2-1 ura3::clonat                                                                                                                                   | Maitreya Dunham             |
| FM527    | <i>S. kudriavzevii</i>                                                                                                                                                           | Mark Johnston               |
| FM356    | <i>S. mikatae</i>                                                                                                                                                                | Mark Johnston               |
| DBY10073 | <i>S. paradoxus</i>                                                                                                                                                              | Maitreya Dunham             |

Table S2: Plasmids used in this study

| <b>Plasmid</b> | <b>Description</b>                                     | <b>Purpose</b>          | <b>Source</b> |
|----------------|--------------------------------------------------------|-------------------------|---------------|
| pDP69          | pMAL-MBP-FLAG- <i>CDC6(Amino Acids 1-513)</i> -6xHIS   | Cdc6 purification       | This study    |
| pDP70          | pMAL-MBP-FLAG- <i>CDC6(Amino Acids 202-513)</i> -6xHIS | Cdc6-short purification | This study    |
